# Supplementary material for: Histones H3 and H4 require their relevant amino-tails for efficient nuclear import and replication-coupled chromatin assembly in vivo
Source: PubMed Central journal article supplement (PMC5465201; doi:10.1038/s41598-017-03218-6), 2017-06-08
Supplement: 41598_2017_3218_MOESM1_ESM.pdf [file 41598_2017_3218_MOESM1_ESM.pdf]

**Histones H3 and H4 require their relevant amino-tails for efficient nuclear import and replication-coupled chromatin assembly *in vivo***

Aïda Ejlassi†, Vanessa Menil-Philippot†, Angélique Galvani, Christophe Thiriet\*

UFIP UMR-CNRS 6286, Epigénétique: prolifération et différenciation, Faculté des Sciences et des Techniques, 2 rue de la Houssinière, 44322 Nantes.

\*: [Christophe.Thiriet@univ-nantes.fr](mailto:Christophe.Thiriet@univ-nantes.fr)

†: These authors contributed equally to this work

**FH3**

**MDYKDDDDK**PWARTKQTARKSTGGKAPRKQLATKAARKSAPATGGVKKPHRYRPGTVALREIRRYQKSTELLIRKLPFQRLVREIAQDFKTDLRFQSSAVMALQEASEAYLV  
ALFEDTNLAAIHAKRVTIMPKDIQLARRIGERA

**H3**

MARTKQTARKSTGGKAPRKQLATKAARKSAPATGGVKKPHRYRPGTVALREIRRYQKSTELLIRKLPFQRLVREIAQDFKTDLRFQSSAVMALQEASEAYLV  
ALFEDTNLAAIHAKRVTIMPKDIQLARRIGERA

**nFH4gH3**

**MDYKDDDK**SGRGKGGKGLGKGGAKRHSAPATGGVKKPHRYRPGTVALREIRRYQKSTELLIRKLPFQRLVREIAQDFKTDLRFQSSAVMALQEASEAYLV  
ALFEDTNLAAIHAKRVTIMPKDIQLARRIGERA

**H4**

MSGRGKGGKGLGKGGAKRHRKVLVDNIQGITKPAIRRLARRGGVKRISGLIYEETRGVLKVFLNVIRDAV  
TYTEHAKRKTVTAMDVVYALKRQGRTLYGFGG

**FH4**

**MDYKDDDK**SGRGKGGKGLGKGGAKRHRKVLVDNIQGITKPAIRRLARRGGVKRISGLIYEETRGVLKVFLNVIRDAV  
TYTEHAKRKTVTAMDVVYALKRQGRTLYGFGG

**nH3gH4**

MARTKQTARKSTGGKAPRKQLATKAARRKVLVDNIQGITKPAIRRLARRGGVKRISGLIYEETRGVLKVFLNVIRDAV  
TYTEHAKRKTVTAMDVVYALKRQGRTLYGFGG

**Figure S1: Histone sequences.** Shown is the sequence of the histones used for generating the different complexes. Highlighted in red is the FLAG sequence, the amino-acids in blue correspond to H3 and the amino-acids in green correspond to H4.

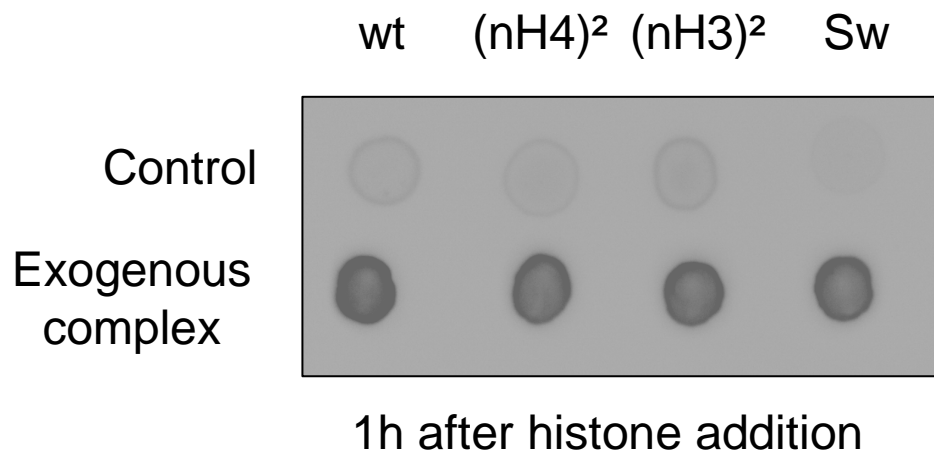

**Figure S2: Dot blot analyses of cell lysates.** Cell fragments cultured in presence of Hydroxy-Urea were untreated (Control) and treated (Exogenous complex) for 1h at the onset of S-phase with exogenous complexes, wt, (nH4)<sup>2</sup>, (nH3)<sup>2</sup> and Sw, respectively. Cellular extracts were prepared and analyzed by dot blotting revealed with anti-FLAG antibody.

|                          | wt         | (nH4) <sup>2</sup> | (nH3) <sup>2</sup> | Sw         |
|--------------------------|------------|--------------------|--------------------|------------|
| ΔCt early replicon/input | 10.9±0.04  | 11.06±0.04         | 11.26±0.05         | 12.01±0.03 |
| ΔCt late replicon/input  | 12.98±0.05 | 9.87±0.01          | 10.84±0.03         | 10.75±0.02 |

Table S1: Delta Ct calculation of ChIP experiments: Duplicates of independent incorporation and duplicates of q-PCR analyses were used for the calculations. No specific amplicons were detected from ChIP of control cells untreated with exogenous (Ct > 40).
